# Supplementary material for: Transcriptomic Analysis of Three Differentially Senescing Maize (Zea mays L.) Inbred Lines upon Heat Stress
Source: MDPI journal article supplement (doi:10.3390/ijms24129782), 2023-06-06
Supplement: s1 [file s1]

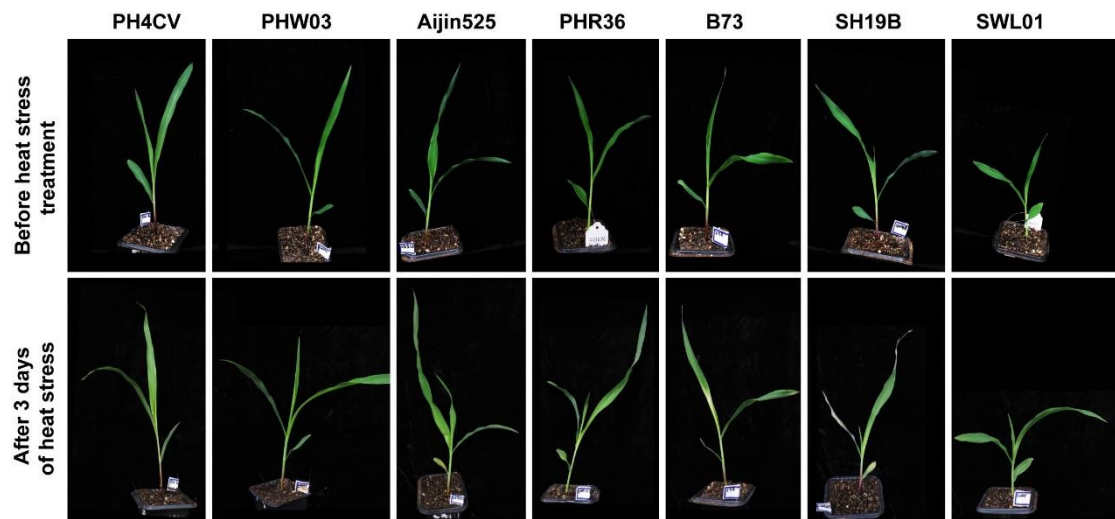

Figure S1 High temperature treatment of different maize inbred seedlings

Table S1 Overview of the sequence assembly after sequencing

| Sample     | Clean reads | Clean bases | Error rate (%) | Q20 (%) | Q30 (%) | GC content (%) |
|------------|-------------|-------------|----------------|---------|---------|----------------|
| HT_PH4CV_2 | 46,840,688  | 6728360721  | 0.0255         | 97.72   | 93.75   | 55.36          |
| HT_PH4CV_1 | 55,332,556  | 7983560799  | 0.0254         | 97.74   | 93.86   | 55.73          |
| CK_PH4CV_2 | 50,770,178  | 7421401024  | 0.0252         | 97.85   | 94.08   | 57.48          |
| CK_PH4CV_1 | 52,350,738  | 7624006548  | 0.0254         | 97.76   | 93.82   | 56.83          |
| HT_B73_2   | 45,039,012  | 6628242089  | 0.0252         | 97.81   | 94.04   | 55.82          |
| HT_B73_1   | 41,105,738  | 6056041940  | 0.0256         | 97.68   | 93.7    | 55.59          |
| CK_B73_2   | 46,933,910  | 6903152502  | 0.0254         | 97.78   | 93.93   | 56.36          |
| CK_B73_1   | 45,979,874  | 6706516175  | 0.025          | 97.93   | 94.31   | 55.99          |
| HT_SH19B_2 | 49,722,024  | 7286026078  | 0.025          | 97.91   | 94.21   | 55.22          |
| HT_SH19B_1 | 47,843,076  | 7010705162  | 0.0254         | 97.77   | 93.9    | 55.45          |
| CK_SH19B_2 | 48,882,932  | 7173025201  | 0.0253         | 97.78   | 93.97   | 56.64          |
| CK_SH19B_1 | 52,184,754  | 7555286216  | 0.025          | 97.93   | 94.32   | 56.64          |

Table S2 Summary of reads mapping to the reference genome

| Sample     | Clean reads | Total mapped     | Multiple mapped | Uniquely mapped  |
|------------|-------------|------------------|-----------------|------------------|
| HT_PH4CV_2 | 46840688    | 40024835(85.45%) | 2350878(5.02%)  | 37673957(80.43%) |
| HT_PH4CV_1 | 55332556    | 47474737(85.8%)  | 2701570(4.88%)  | 44773167(80.92%) |
| CK_PH4CV_2 | 50770178    | 44866303(88.37%) | 1690258(3.33%)  | 43176045(85.04%) |
| CK_PH4CV_1 | 52350738    | 46052371(87.97%) | 1781891(3.4%)   | 44270480(84.57%) |
| HT_B73_2   | 45039012    | 42427766(94.2%)  | 1807935(4.01%)  | 40619831(90.19%) |
| HT_B73_1   | 41105738    | 38526388(93.73%) | 1643912(4.0%)   | 36882476(89.73%) |
| CK_B73_2   | 46933910    | 43778794(93.28%) | 1762350(3.75%)  | 42016444(89.52%) |

|            |          |                  |                |                  |
|------------|----------|------------------|----------------|------------------|
| CK_B73_1   | 45979874 | 43118906(93.78%) | 1652792(3.59%) | 41466114(90.18%) |
| HT_SH19B_2 | 49722024 | 42997179(86.48%) | 2375705(4.78%) | 40621474(81.7%)  |
| HT_SH19B_1 | 47843076 | 41130128(85.97%) | 2253470(4.71%) | 38876658(81.26%) |
| CK_SH19B_2 | 48882932 | 42501619(86.95%) | 1555796(3.18%) | 40945823(83.76%) |
| CK_SH19B_1 | 52184754 | 45345814(86.89%) | 1813199(3.47%) | 43532615(83.42%) |

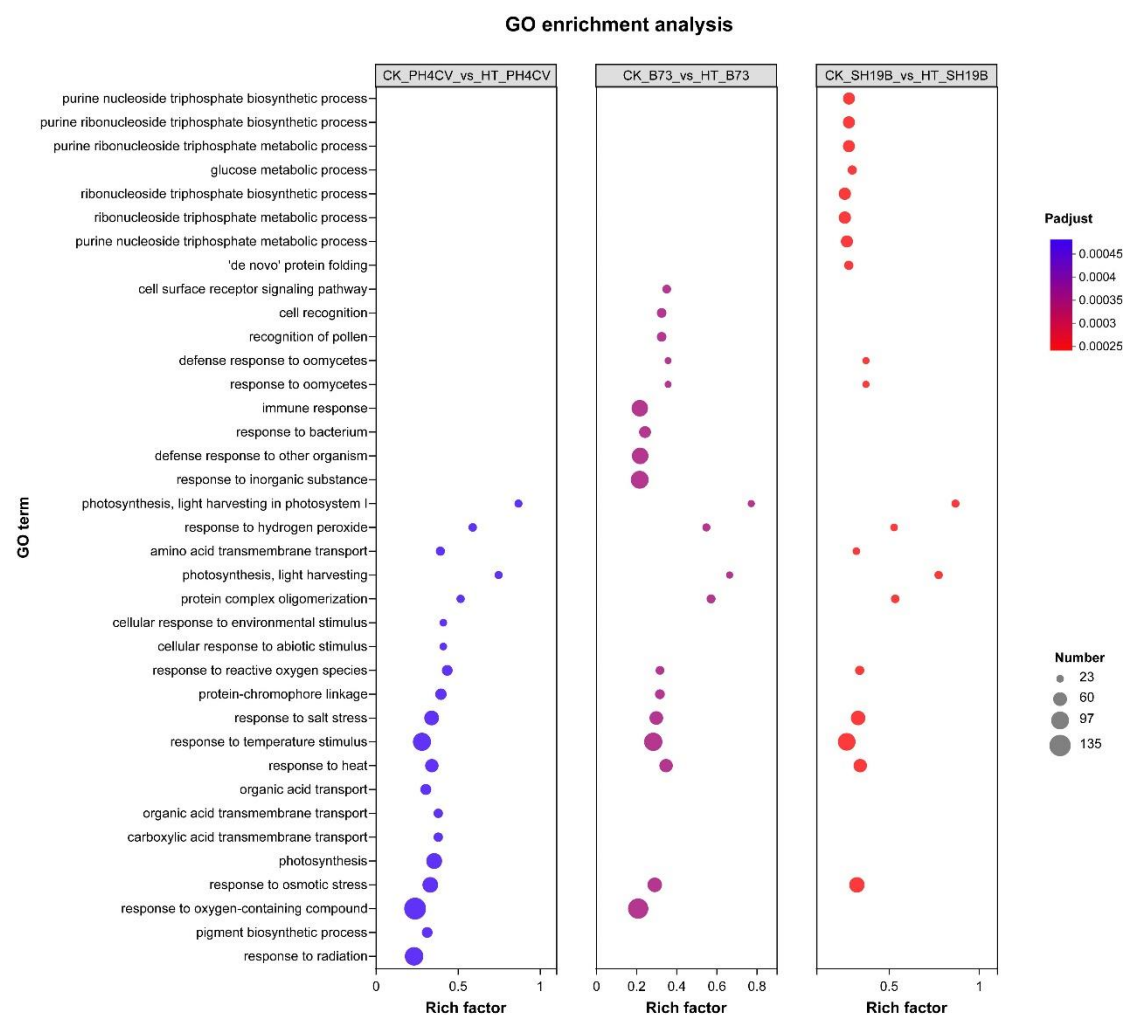

**Figure S2. GO enrichment analysis of DEGs in response to heat stress in three maize varieties.** The horizontal axis represents the degree of enrichment (rich factor), the vertical axis represents the enriched GO terms; the size of the dot represents the number of differential genes enriched in a GO term; the color of the dot represents the different *P*adjust value; rich factor represents the number of differential genes belonging to a GO term. The higher rich factor is, the higher the enrichment of GO term. CK, untreated control; HT, heat treated.

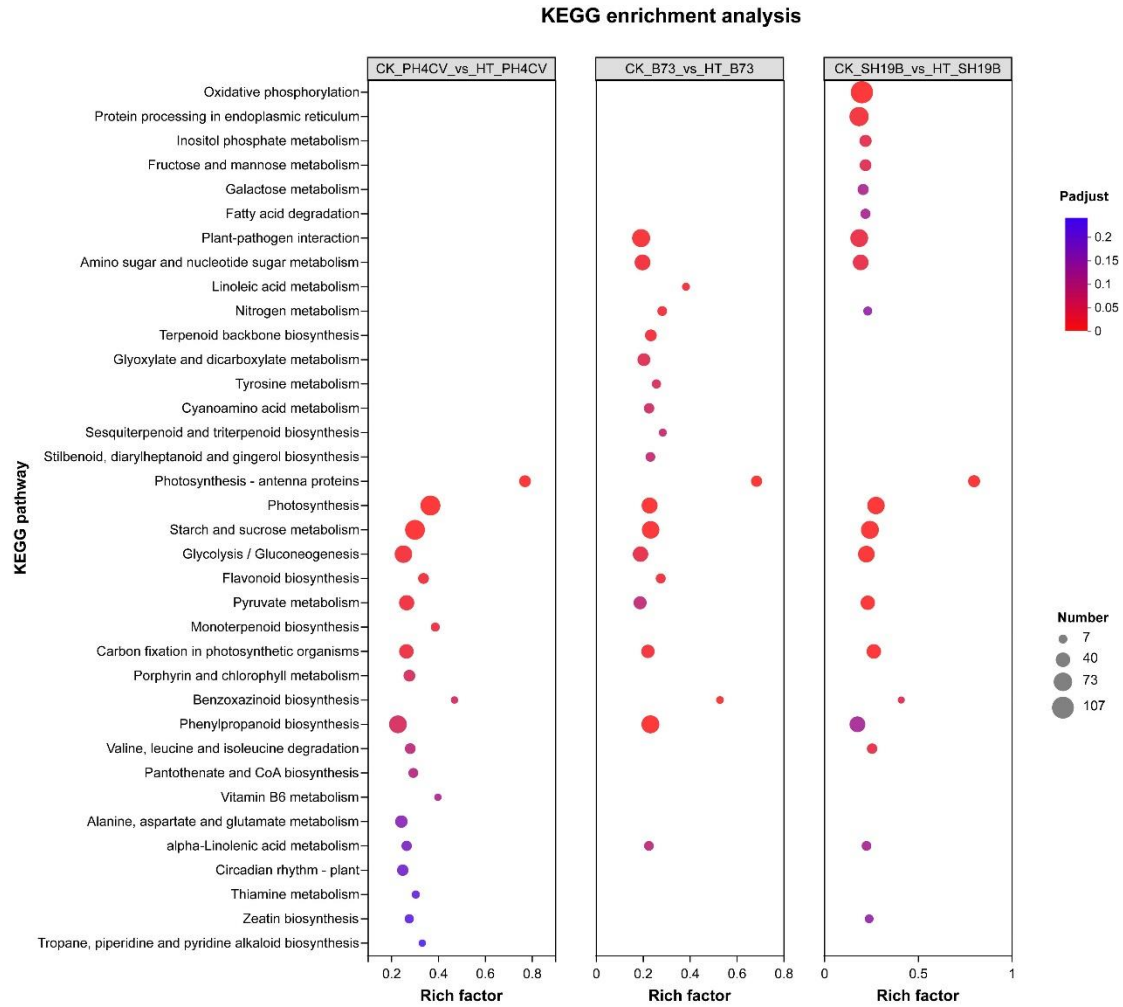

**Figure S3. KEGG enrichment analysis of DEGs in response to heat stress in three maize varieties.** The horizontal axis indicates the degree of enrichment (Rich factor), and the vertical axis indicates the enriched KEGG pathway; the size of the dot indicates the number of differential genes enriched in a certain KEGG pathway; the color of the dot indicates *Padjust* values; Rich Factor represents the number of differential genes belonging to a certain KEGG pathway. The higher the Rich factor, the higher the enrichment of the KEGG pathway. CK, untreated control; HT, heat treated.

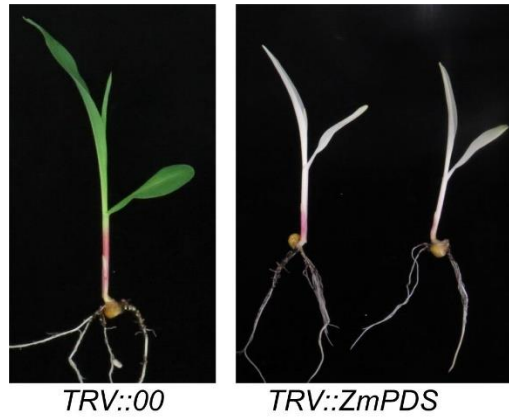

**Figure S4. Silence *ZmPDS* through VIGS**

Table S3 qRT-PCR primers

| Name        | Sequence                |
|-------------|-------------------------|
| qZmActin-F  | CTGAGGTTCTATTCCAGCCATCC |
| qZmActin-R  | CCACCACTGAGGACAACATTACC |
| qZmbHLH51-F | AGGATCAATGCTCACCTCGC    |
| qZmbHLH51-R | GCGATCTCGTTGGTCTCTCC    |

Table S4 Primers for vector construction

| Name          | Sequence                                       |
|---------------|------------------------------------------------|
| Zm85705-300-F | AGCCCGGGTGGTTTGCCAAC                           |
| Zm85705-300-R | CTGCACAGTACGAAGTCACA                           |
| TRV-Zm85705-F | CGACGACAAGACCCTCTGCAGAGCCCGGGTGGTT<br>TGCCAAC  |
| TRV-Zm85705-R | GAGGAGAAGAGCCCTCTGCAG<br>CTGCACAGTACGAAGTCACA  |
| ZmPDS-F       | CTAGCCAAGTTATTTCTGA                            |
| ZmPDS-R       | GGGACGGGAACCTTCTCCTGA                          |
| Trv-ZmPDS-F   | CGACGACAAGACCCTCTGCAGCTAGCCAAGTTATT<br>TCCTGA  |
| Trv-ZmPDS-R   | GAGGAGAAGAGCCCTCTGCAGGGGACGGGAACCT<br>TCTCCTGA |
